# Supplementary material for: Increased aerosols content in the atmosphere over Ukraine during summer 2010
Source: Copernicus journal article supplement (doi:10.5194/amt-2017-336), 2017-10-12

NOAA HYSPLIT MODEL  
Backward trajectories ending at 1000 UTC 10 Jun 10  
GDAS Meteorological Data

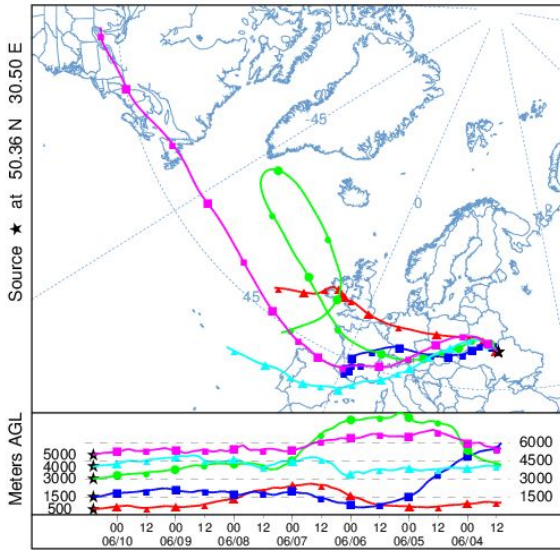

Figure S05. June 10, 2010

NOAA HYSPLIT MODEL  
Backward trajectories ending at 0000 UTC 11 Jun 10  
GDAS Meteorological Data

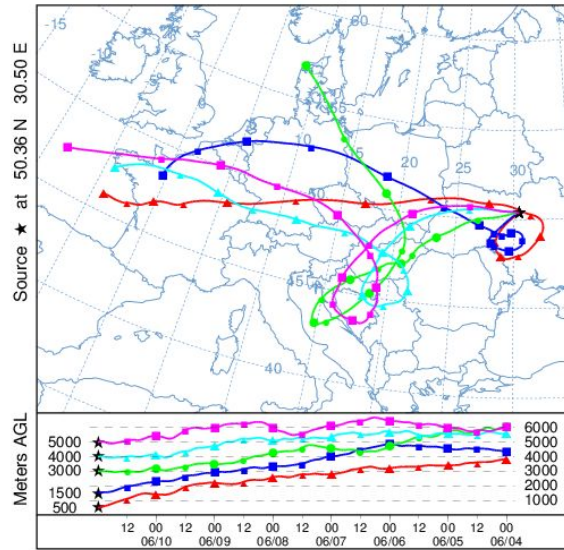

Figure S06. June 11, 2010

NOAA HYSPLIT MODEL  
Backward trajectories ending at 1000 UTC 12 Jun 10  
GDAS Meteorological Data

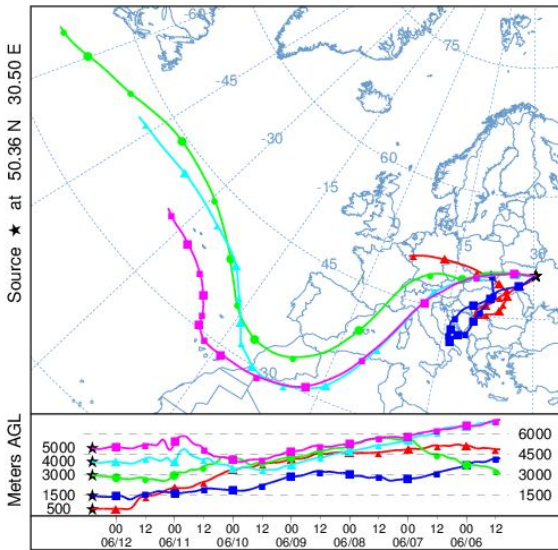

Figure S07. June 12, 2010

NOAA HYSPLIT MODEL  
Backward trajectories ending at 1100 UTC 13 Jun 10  
GDAS Meteorological Data

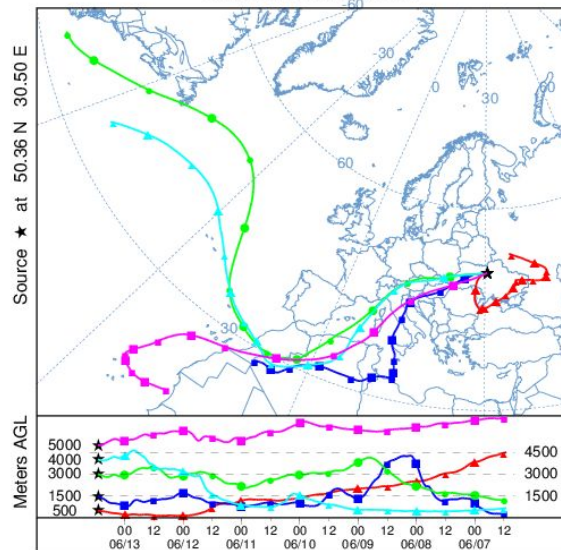

Figure 08. June 13, 2010



NOAA HYSPLIT MODEL  
 Backward trajectories ending at 0000 UTC 27 Jun 10  
 GDAS Meteorological Data

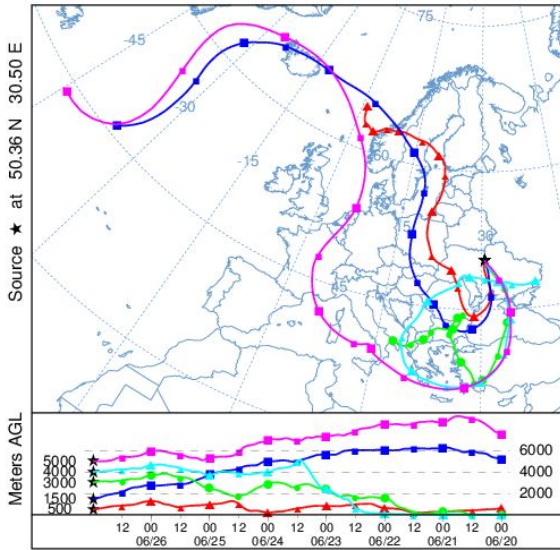

Figure S13. June 27, 2010

NOAA HYSPLIT MODEL  
 Backward trajectories ending at 1000 UTC 28 Jun 10  
 GDAS Meteorological Data

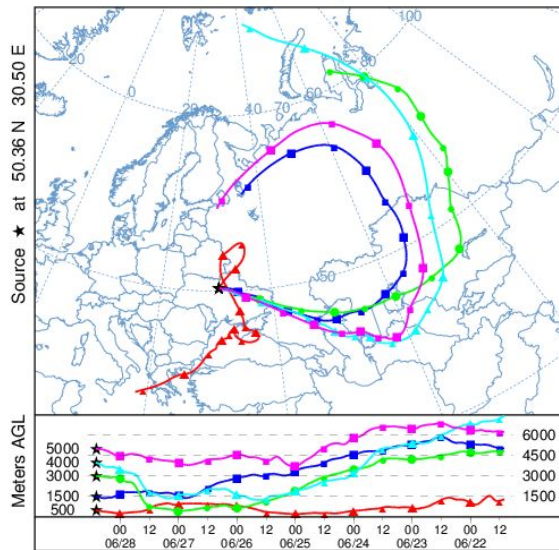

Figure S14. June 28, 2010

NOAA HYSPLIT MODEL  
 Backward trajectories ending at 0000 UTC 29 Jun 10  
 GDAS Meteorological Data

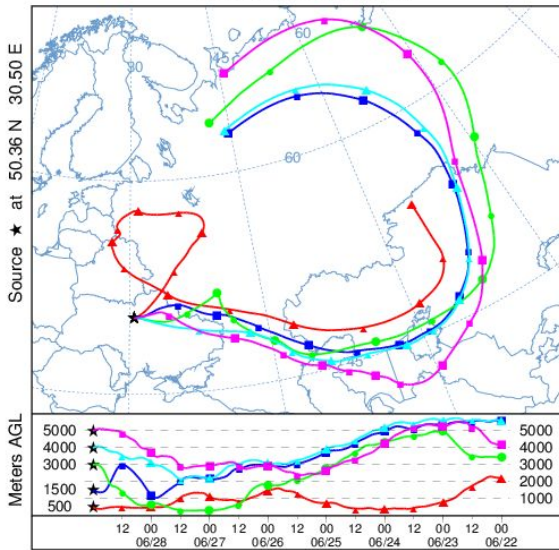

Figure S15. June 29, 2010

NOAA HYSPLIT MODEL  
 Backward trajectories ending at 1000 UTC 30 Jun 10  
 GDAS Meteorological Data

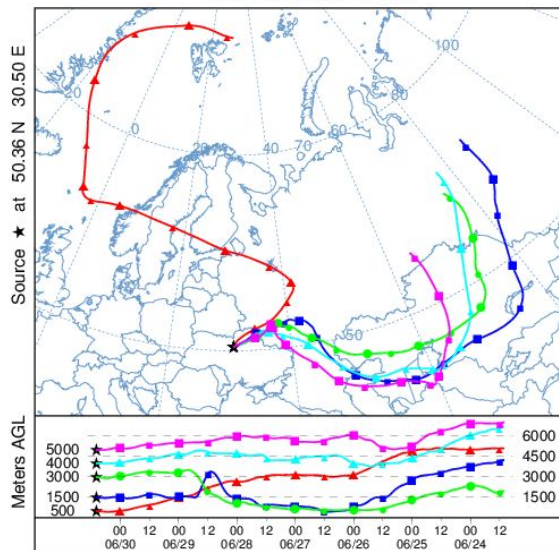

Figure S16. June 30, 2010

NOAA HYSPLIT MODEL  
Backward trajectories ending at 0000 UTC 02 Jul 10  
GDAS Meteorological Data

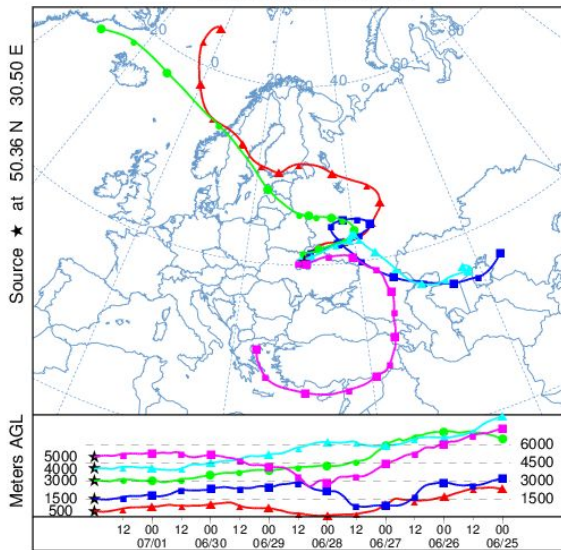

Figure S17. July 2, 2010

NOAA HYSPLIT MODEL  
Backward trajectories ending at 1100 UTC 03 Jul 10  
GDAS Meteorological Data

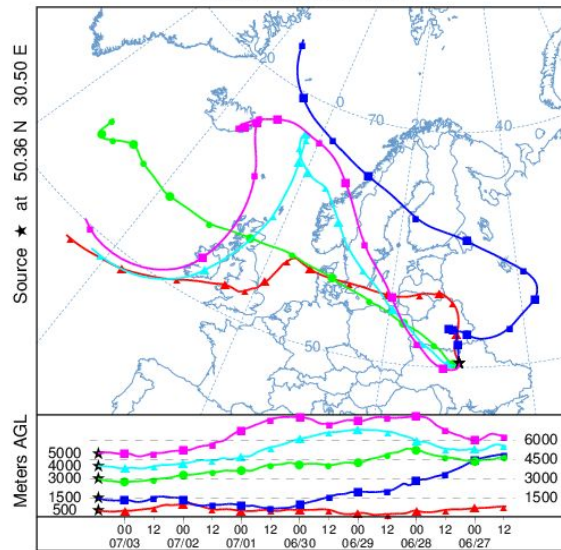

Figure S18. July 3, 2010

NOAA HYSPLIT MODEL  
Backward trajectories ending at 0000 UTC 04 Jul 10  
GDAS Meteorological Data

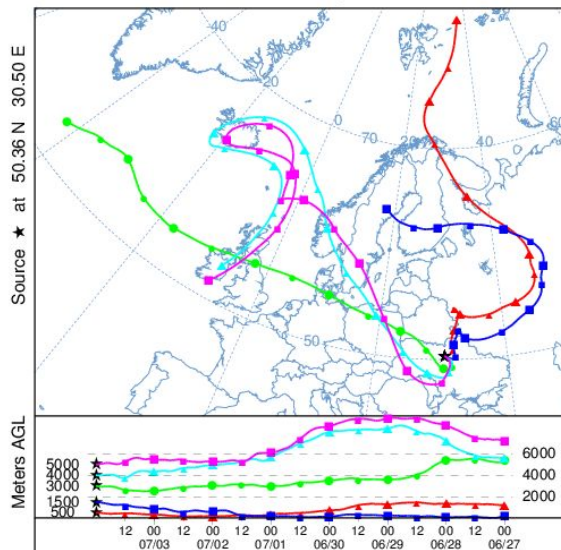

Figure S19. July 4, 2010

NOAA HYSPLIT MODEL  
Backward trajectories ending at 1000 UTC 05 Jul 10  
GDAS Meteorological Data

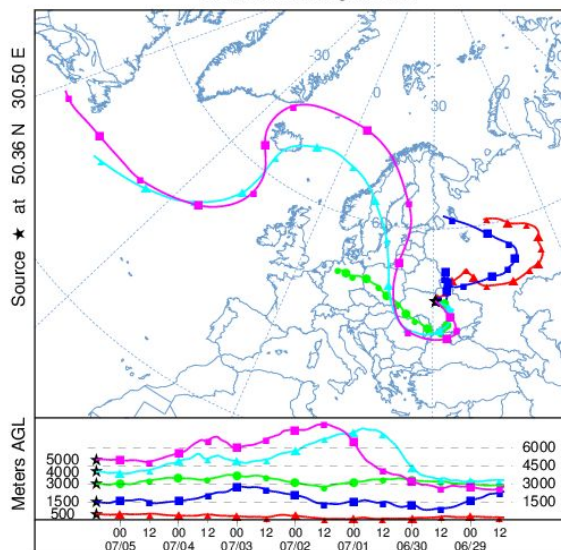

Figure S20. July 5, 2010



NOAA HYSPLIT MODEL  
 Backward trajectories ending at 0000 UTC 17 Jul 10  
 GDAS Meteorological Data

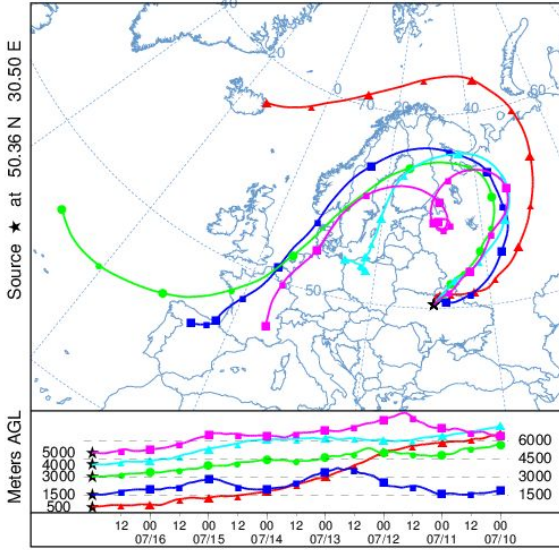

Figure S25. July 17, 2010

NOAA HYSPLIT MODEL  
 Backward trajectories ending at 2300 UTC 18 Jul 10  
 GDAS Meteorological Data

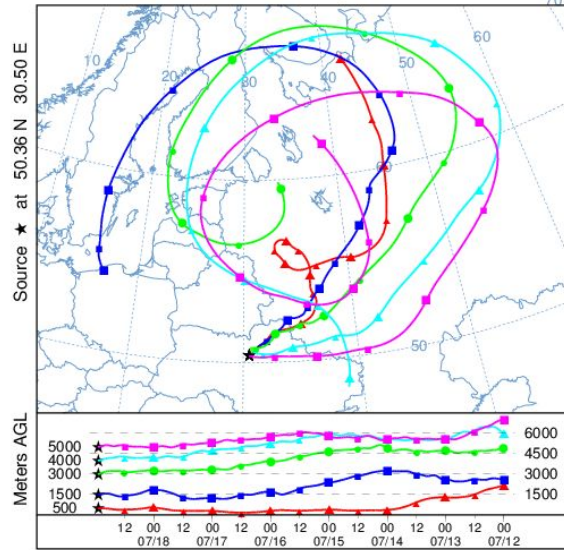

Figure S26. July 18, 2010

NOAA HYSPLIT MODEL  
 Backward trajectories ending at 1000 UTC 28 Jul 10  
 GDAS Meteorological Data

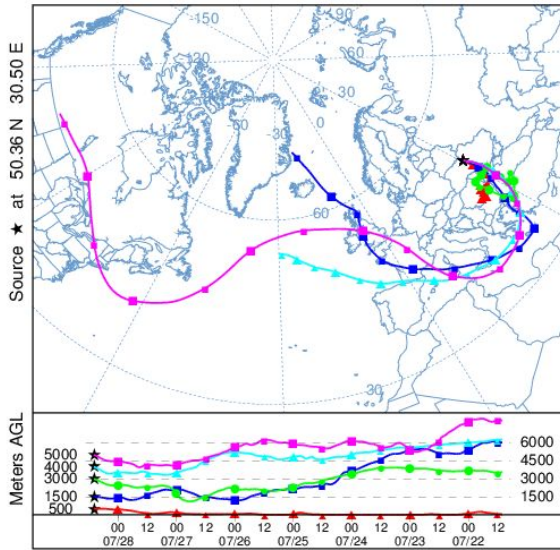

Figure S27. July 28, 2010

NOAA HYSPLIT MODEL  
 Backward trajectories ending at 0000 UTC 02 Aug 10  
 GDAS Meteorological Data

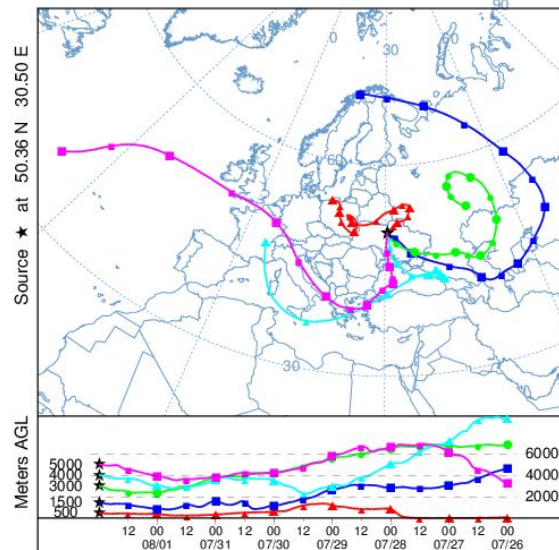

Figure S28. August 2, 2010

NOAA HYSPLIT MODEL  
 Backward trajectories ending at 1100 UTC 07 Aug 10  
 GDAS Meteorological Data

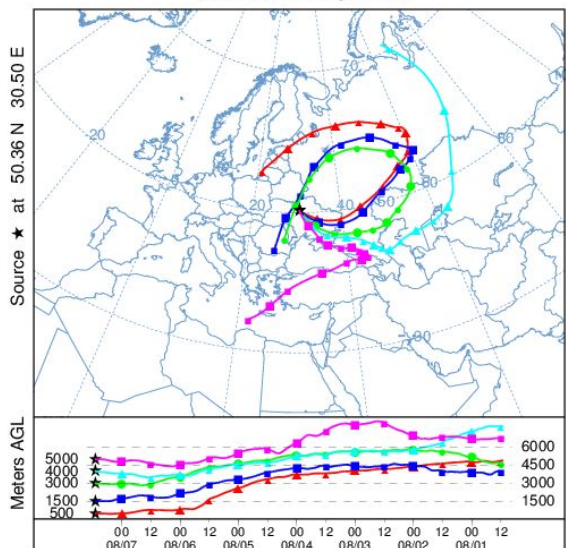

Figure S29. August 7, 2010

NOAA HYSPLIT MODEL  
 Backward trajectories ending at 1100 UTC 14 Aug 10  
 GDAS Meteorological Data

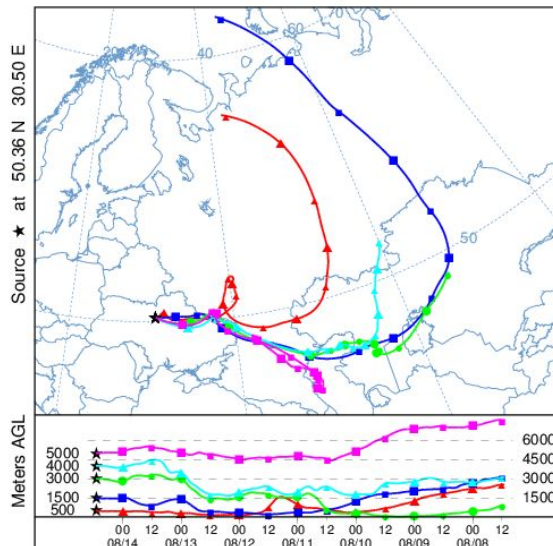

Figure S30. August 14, 2010



**Figures S31– S88** represent extinction coefficient of aerosols obtained from CALIPSO for the period August 7-12, 2010. Additional information is added to each figure and was taken directly from the CALIPSO Aerosols Profile Product Level 2.0 Version 3.01 and 3.02 data base. This additional information consists of:

- Date and Time
- Location
- AOD 532 nm
- Extinction Coefficient (plotted on Figures)
- Maximum of the Extinction Coefficient (Extinc.koef.max) and its uncertainty (Extinc.koef.max.Uncert)
- Average of the Extinction Coefficient (Extinc.koef.average)\*
- Median of the Extinction Coefficient (Extinc.koef.median)
- Heights of top and bottom of integral aerosol layers (Layer Height max, Layer Height min correspondingly)
- Height of Extinction Coefficient maximum (Height of Extinc.koef.max)
- Effective height of aerosols layer (Effective Height of Layer)

\* Average of the Extinction Coefficient (Extinc.koef.average) of integral aerosol layers were computed using data mentioned above.

Effective heights of integral aerosol layers were computed from Extinction Coefficient vertical profile data as

$$H_{Eff} = \frac{\int_{H_{Min}}^{H_{Max}} z \cdot C_{Ext}(z) \cdot dz}{\int_{H_{Min}}^{H_{Max}} C_{Ext}(z) \cdot dz}$$

where  $z$  is the vertical coordinate,  
 $C_{Ext}(z)$  is the Extinction Coefficient,  
 $H_{Min}$ ,  $H_{Max}$  are respectively the bottom and top bounds of the integral aerosol layer.

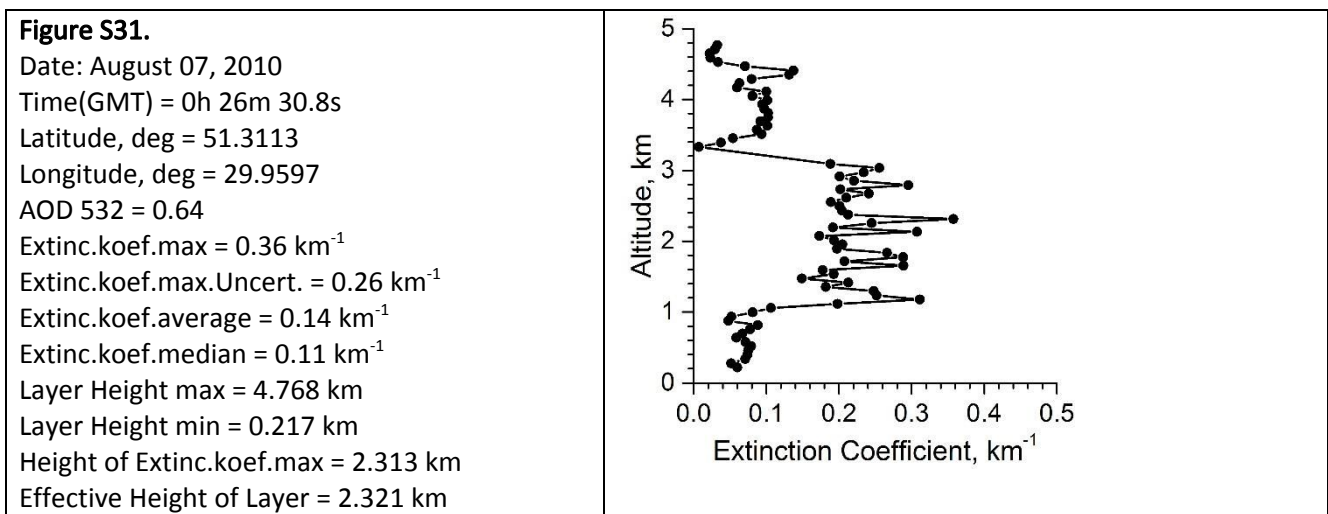

**Figure S32.**

Date: August 07, 2010  
 Time(GMT) = 0h 26m 44.2s  
 Latitude, deg = 50.5201  
 Longitude, deg = 29.6139  
 AOD 532 = 1.92  
 Extinc.koef.max = 3.02 km<sup>-1</sup>  
 Extinc.koef.max.Uncert. = 22.14 km<sup>-1</sup>  
 Extinc.koef.average = 0.42 km<sup>-1</sup>  
 Extinc.koef.median = 0.29 km<sup>-1</sup>  
 Layer Height max = 4.768 km  
 Layer Height min = 0.217 km  
 Height of Extinc.koef.max = 0.217 km  
 Effective Height of Layer = 1.406 km

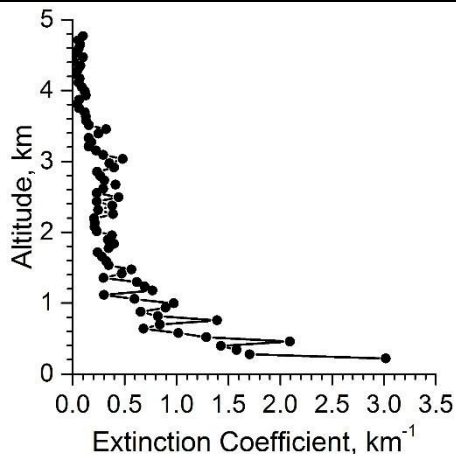**Figure S33.**

Date: August 07, 2010  
 Time(GMT) = 0h 27m 19.9s  
 Latitude, deg = 48.4042  
 Longitude, deg = 28.7376  
 AOD 532 = 0.55  
 Extinc.koef.max = 0.40 km<sup>-1</sup>  
 Extinc.koef.max.Uncert. = 0.31 km<sup>-1</sup>  
 Extinc.koef.average = 0.12 km<sup>-1</sup>  
 Extinc.koef.median = 0.08 km<sup>-1</sup>  
 Layer Height max = 4.888 km  
 Layer Height min = 0.337 km  
 Height of Extinc.koef.max = 0.457 km  
 Effective Height of Layer = 1.793 km

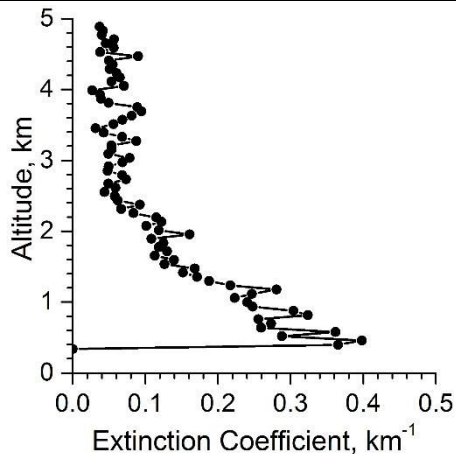**Figure S34.**

Date: August 08, 2010  
 Time(GMT) = 10h 41m 8.9s  
 Latitude, deg = 47.6677  
 Longitude, deg = 36.9564  
 AOD 532 = 1.01  
 Extinc.koef.max = 3.42 km<sup>-1</sup>  
 Extinc.koef.max.Uncert. = 5.64 km<sup>-1</sup>  
 Extinc.koef.average = 0.29 km<sup>-1</sup>  
 Extinc.koef.median = 0.10 km<sup>-1</sup>  
 Layer Height max = 3.750 km  
 Layer Height min = 0.217 km  
 Height of Extinc.koef.max = 3.331 km  
 Effective Height of Layer = 2.930 km

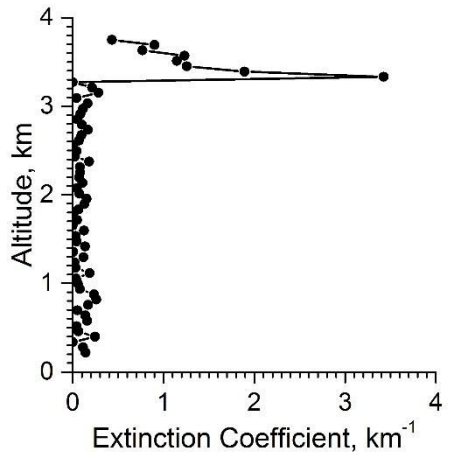

**Figure S35.**

Date: August 08, 2010  
 Time(GMT) = 10h 41m 19.3s  
 Latitude, deg = 48.2863  
 Longitude, deg = 36.7132  
 AOD 532 = 0.84  
 Extinc.koef.max = 2.36 km<sup>-1</sup>  
 Extinc.koef.max.Uncert. = 1.59 km<sup>-1</sup>  
 Extinc.koef.average = 0.21 km<sup>-1</sup>  
 Extinc.koef.median = 0.05 km<sup>-1</sup>  
 Layer Height max = 4.169 km  
 Layer Height min = 0.158 km  
 Height of Extinc.koef.max = 3.451 km  
 Effective Height of Layer = 3.065 km

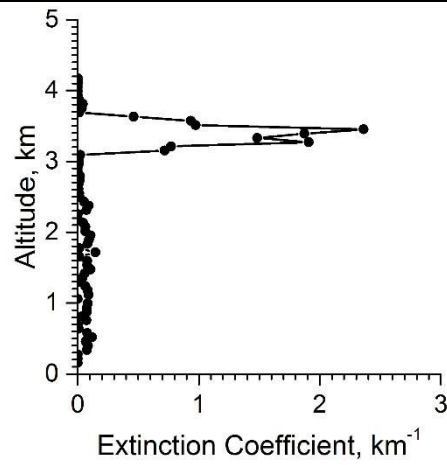**Figure S36.**

Date: August 08, 2010  
 Time(GMT) = 10h 41m 55.0s  
 Latitude, deg = 50.4036  
 Longitude, deg = 35.8398  
 AOD 532 = 2.14  
 Extinc.koef.max = 4.04 km<sup>-1</sup>  
 Extinc.koef.max.Uncert. = 99.99 km<sup>-1</sup>  
 Extinc.koef.average = 0.54 km<sup>-1</sup>  
 Extinc.koef.median = 0.27 km<sup>-1</sup>  
 Layer Height max = 4.169 km  
 Layer Height min = 0.217 km  
 Height of Extinc.koef.max = 0.217 km  
 Effective Height of Layer = 1.690 km

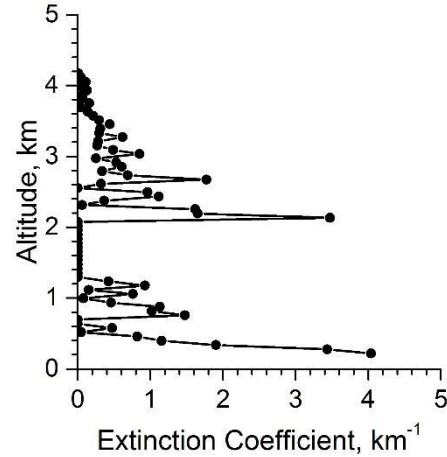**Figure S37.**

Date: August 08, 2010  
 Time(GMT) = 10h 42m 12.2s  
 Latitude, deg = 51.4143  
 Longitude, deg = 35.3986  
 AOD532 = 0.82  
 Extinc.koef.max = 1.51 km<sup>-1</sup>  
 Extinc.koef.max.Uncert. = 2.91 km<sup>-1</sup>  
 Extinc.koef.average = 0.31 km<sup>-1</sup>  
 Extinc.koef.median = 0.27 km<sup>-1</sup>  
 Layer Height max = 2.912 km  
 Layer Height min = 0.277 km  
 Height of Extinc.koef.max = 0.337 km  
 Effective Height of Layer = 1.418 km

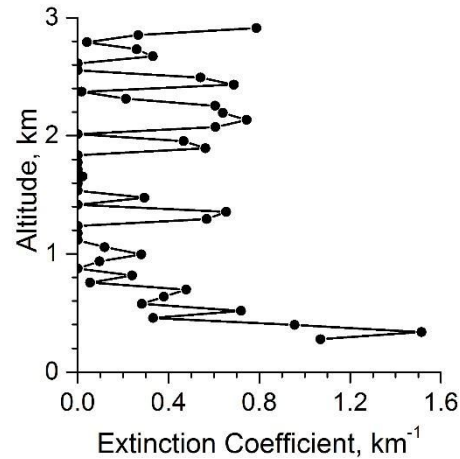

**Figure S38.**

Date: August 08, 2010  
Time(GMT) = 10h 42m 22.0s  
Latitude, deg = 51.9867  
Longitude, deg = 35.1411  
AOD 532 = 0.72  
Extinc.koef.max = 1.51 km<sup>-1</sup>  
Extinc.koef.max.Uncert. = 2.91 km<sup>-1</sup>  
Extinc.koef.average = 0.21 km<sup>-1</sup>  
Extinc.koef.median = 0.12 km<sup>-1</sup>  
Layer Height max = 3.750 km  
Layer Height min = 0.277 km  
Height of Extinc.koef.max = 0.337 km  
Effective Height of Layer = 1.398 km

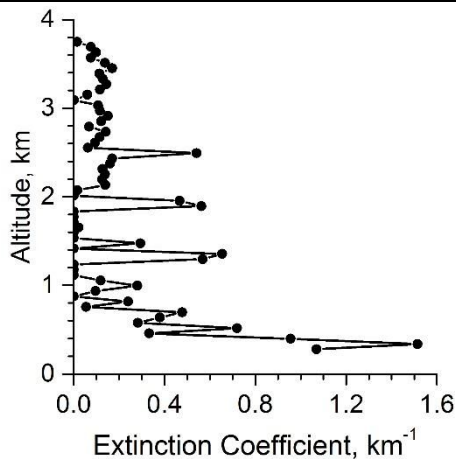

**Figure S39.**

Date: August 09, 2010  
Time(GMT) = 0h 14m 4.5s  
Latitude, deg = 51.5390  
Longitude, deg = 33.1510  
AOD 532 = 0.84  
Extinc.koef.max = 0.49 km<sup>-1</sup>  
Extinc.koef.max.Uncert. = 0.19 km<sup>-1</sup>  
Extinc.koef.average = 0.19 km<sup>-1</sup>  
Extinc.koef.median = 0.19 km<sup>-1</sup>  
Layer Height max = 4.529 km  
Layer Height min = 0.158 km  
Height of Extinc.koef.max = 0.217 km  
Effective Height of Layer = 2.083 km

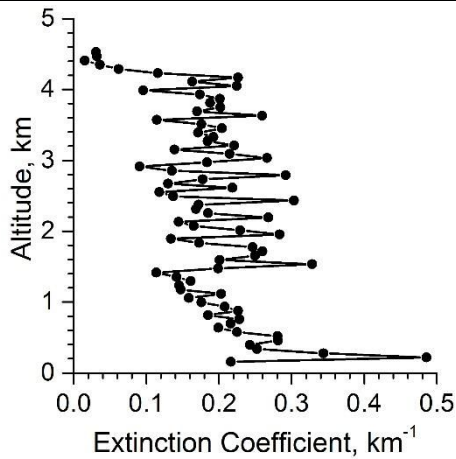

**Figure S40.**

Date: August 09, 2010  
Time(GMT) = 0h 14m 23.1s  
Latitude, deg = 50.4398  
Longitude, deg = 32.6701  
AOD 532 = 0.81  
Extinc.koef.max = 0.74 km<sup>-1</sup>  
Extinc.koef.max.Uncert. = 0.32 km<sup>-1</sup>  
Extinc.koef.average = 0.19 km<sup>-1</sup>  
Extinc.koef.median = 0.18 km<sup>-1</sup>  
Layer Height max = 4.588 km  
Layer Height min = 0.217 km  
Height of Extinc.koef.max = 4.528 km  
Effective Height of Layer = 2.797 km

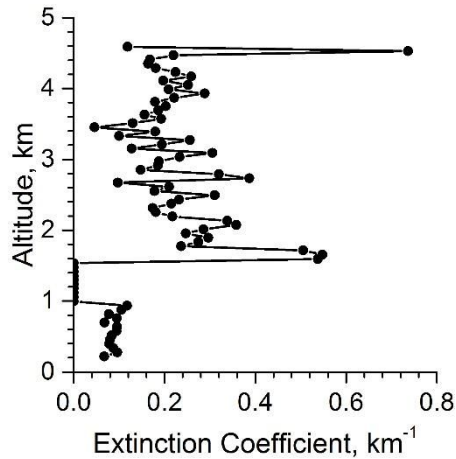

**Figure S41.**

Date: August 09, 2010  
Time(GMT) = 0h 14m 49.9s  
Latitude, deg = 48.8535  
Longitude, deg = 32.0089  
AOD 532 = 1.63  
Extinc.koef.max = 4.21 km<sup>-1</sup>  
Extinc.koef.max.Uncert. = 4.08 km<sup>-1</sup>  
Extinc.koef.average = 0.32 km<sup>-1</sup>  
Extinc.koef.median = 0.17 km<sup>-1</sup>  
Layer Height max = 5.487 km  
Layer Height min = 0.337 km  
Height of Extinc.koef.max = 0.34 km  
Effective Height of Layer = 1.380 km

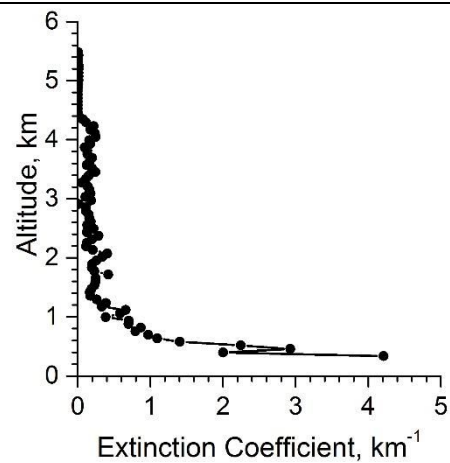**Figure S42.**

Date: August 09, 2010  
Time(GMT) = 0h 15m 9.2s  
Latitude, deg = 47.7046  
Longitude, deg = 31.5519  
AOD 532 = 1.41  
Extinc.koef.max = 2.70 km<sup>-1</sup>  
Extinc.koef.max.Uncert. = 1.29 km<sup>-1</sup>  
Extinc.koef.average = 0.32 km<sup>-1</sup>  
Extinc.koef.median = 0.23 km<sup>-1</sup>  
Layer Height max = 4.588 km  
Layer Height min = 0.217 km  
Height of Extinc.koef.max = 4.229 km  
Effective Height of Layer = 2.487 km

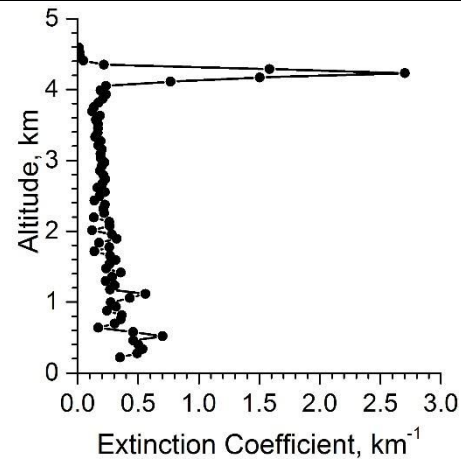**Figure S43.**

Date: August 09, 2010  
Time(GMT) = 0h 15m 20.4s  
Latitude, deg = 47.0423  
Longitude, deg = 31.2962  
AOD 532 = 1.32  
Extinc.koef.max = 2.92 km<sup>-1</sup>  
Extinc.koef.max.Uncert. = 1.15 km<sup>-1</sup>  
Extinc.koef.average = 0.27 km<sup>-1</sup>  
Extinc.koef.median = 0.24 km<sup>-1</sup>  
Layer Height max = 5.008 km  
Layer Height min = 0.159 km  
Height of Extinc.koef.max = 4.109 km  
Effective Height of Layer = 2.372 km

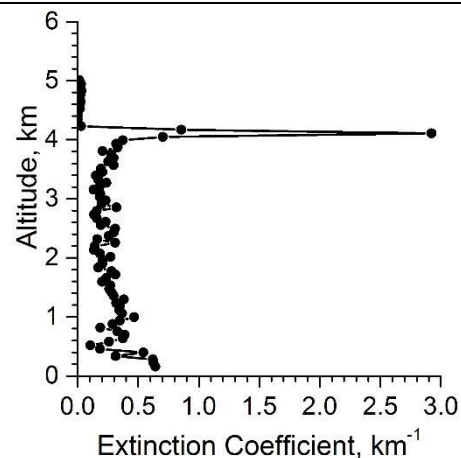

**Figure S44.**

Date: August 09, 2010  
 Time(GMT) = 0h 15m 27.1s  
 Latitude, deg = 46.6447  
 Longitude, deg = 31.1451  
 AOD 532 = 1.36  
 Extinc.koef.max = 0.81 km<sup>-1</sup>  
 Extinc.koef.max.Uncert. = 0.30 km<sup>-1</sup>  
 Extinc.koef.average = 0.26 km<sup>-1</sup>  
 Extinc.koef.median = 0.24 km<sup>-1</sup>  
 Layer Height max = 5.307 km  
 Layer Height min = 0.098 km  
 Height of Extinc.koef.max = 0.158 km  
 Effective Height of Layer = 1.693 km

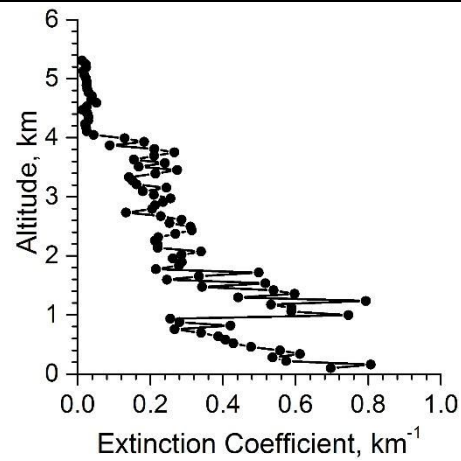**Figure S45.**

Date: August 09, 2010  
 Time(GMT) = 0h 15m 33.8s  
 Latitude, deg = 46.2468  
 Longitude, deg = 30.9956  
 AOD 532 = 1.27  
 Extinc.koef.max = 1.48 km<sup>-1</sup>  
 Extinc.koef.max.Uncert. = 0.61 km<sup>-1</sup>  
 Extinc.koef.average = 0.24 km<sup>-1</sup>  
 Extinc.koef.median = 0.23 km<sup>-1</sup>  
 Layer Height max = 5.427 km  
 Layer Height min = 0.038 km  
 Height of Extinc.koef.max = 0.038 km  
 Effective Height of Layer = 1.648 km

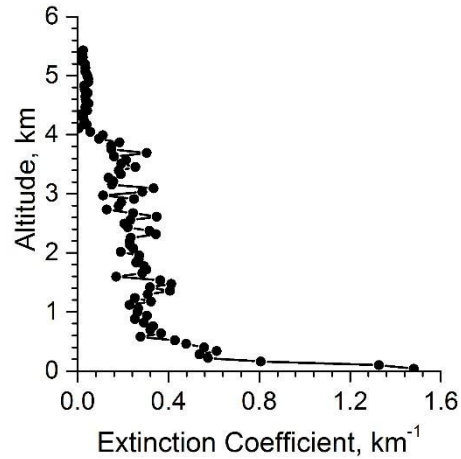**Figure S46.**

Date: August 11, 2010  
 Time(GMT) = 0h 1m 48.7s  
 Latitude, deg = 51.1403  
 Longitude, deg = 36.0654  
 AOD 532 = 0.56  
 Extinc.koef.max = 0.48 km<sup>-1</sup>  
 Extinc.koef.max.Uncert. = 0.24 km<sup>-1</sup>  
 Extinc.koef.average = 0.09 km<sup>-1</sup>  
 Extinc.koef.median = 0.08 km<sup>-1</sup>  
 Layer Height max = 6.145 km  
 Layer Height min = 0.217 km  
 Height of Extinc.koef.max = 4.529 km  
 Effective Height of Layer = 3.121 km

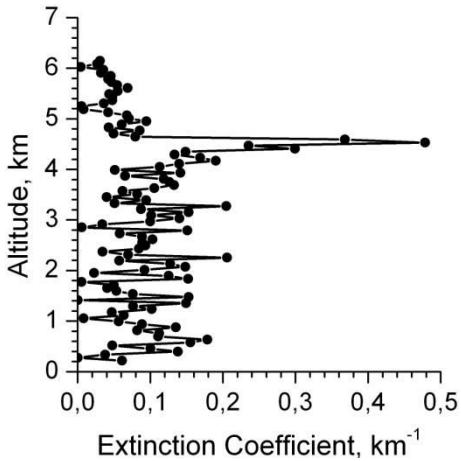

**Figure S47.**

Date: August 11, 2010  
 Time(GMT) = 0h 2m 17.7s  
 Latitude, deg = 49.4225  
 Longitude, deg = 35.3326  
 AOD 532 = 0.75  
 Extinc.koef.max = 0.28 km<sup>-1</sup>  
 Extinc.koef.max.Uncert. = 0.21 km<sup>-1</sup>  
 Extinc.koef.average = 0.14 km<sup>-1</sup>  
 Extinc.koef.median = 0.14 km<sup>-1</sup>  
 Layer Height max = 5.427 km  
 Layer Height min = 0.217 km  
 Height of Extinc.koef.max = 4.109 km  
 Effective Height of Layer = 2.850 km

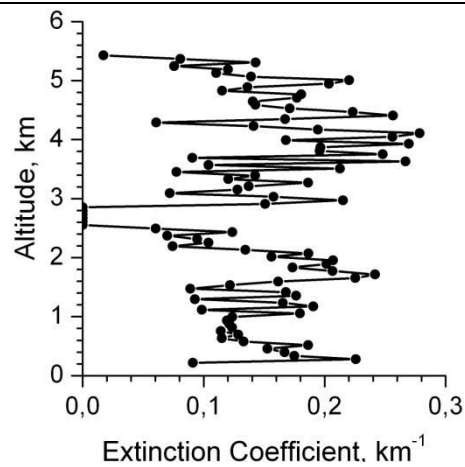**Figure S48.**

Date: August 11, 2010  
 Time(GMT) = 0h 2m 28.1s  
 Latitude, deg = 48.8064  
 Longitude, deg = 35.0803  
 AOD 532 = 1.58  
 Extinc.koef.max = 1.54 km<sup>-1</sup>  
 Extinc.koef.max.Uncert. = 0.57 km<sup>-1</sup>  
 Extinc.koef.average = 0.31 km<sup>-1</sup>  
 Extinc.koef.median = 0.24 km<sup>-1</sup>  
 Layer Height max = 5.367 km  
 Layer Height min = 0.217 km  
 Height of Extinc.koef.max = 4.289 km  
 Effective Height of Layer = 2.144 km

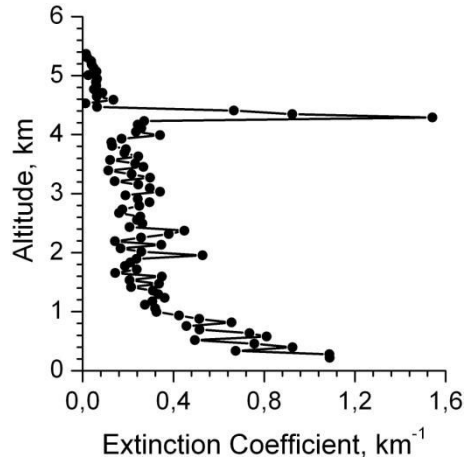**Figure S49.**

Date: August 11, 2010  
 Time(GMT) = 0h 2m 38.5s  
 Latitude, deg = 48.1884  
 Longitude, deg = 34.8330  
 AOD 532 = 2.55  
 Extinc.koef.max = 3.63 km<sup>-1</sup>  
 Extinc.koef.max.Uncert. = 1.37 km<sup>-1</sup>  
 Extinc.koef.average = 0.51 km<sup>-1</sup>  
 Extinc.koef.median = 0.31 km<sup>-1</sup>  
 Layer Height max = 5.367 km  
 Layer Height min = 0.337 km  
 Height of Extinc.koef.max = 4.169 km  
 Effective Height of Layer = 1.983 km

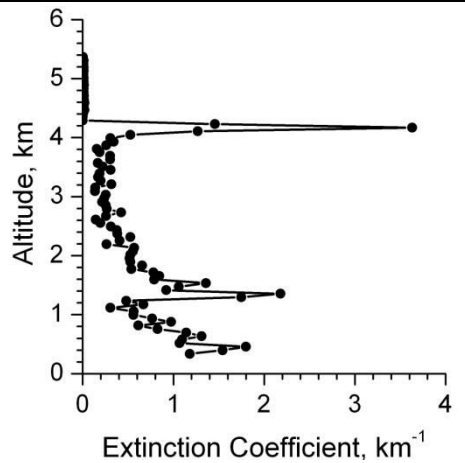

**Figure S50.**

Date: August 11, 2010  
 Time(GMT) = 0h 2m 48.2s  
 Latitude, deg = 47.6141  
 Longitude, deg = 34.6072  
 AOD 532 = 0.869  
 Extinc.koef.max = 1.83 km<sup>-1</sup>  
 Extinc.koef.max.Uncert. = 0.66 km<sup>-1</sup>  
 Extinc.koef.average = 0.21 km<sup>-1</sup>  
 Extinc.koef.median = 0.18 km<sup>-1</sup>  
 Layer Height max = 4.349 km  
 Layer Height min = 0.217 km  
 Height of Extinc.koef.max = 4.229 km  
 Effective Height of Layer = 2.423 km

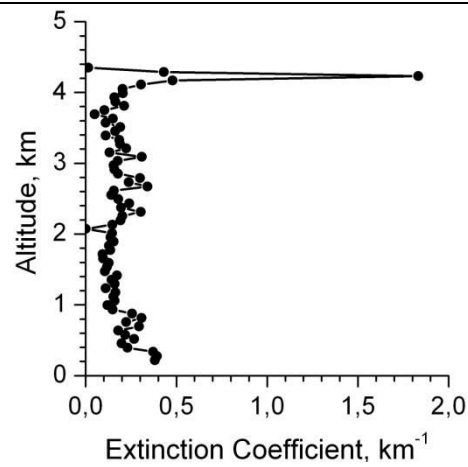**Figure S51.**

Date: August 11, 2010  
 Time(GMT) = 0h 3m 13.5s  
 Latitude, deg = 46.1114  
 Longitude, deg = 34.0359  
 AOD 532 = 0.99  
 Extinc.koef.max = 1.51 km<sup>-1</sup>  
 Extinc.koef.max.Uncert. = 0.58 km<sup>-1</sup>  
 Extinc.koef.average = 0.19 km<sup>-1</sup>  
 Extinc.koef.median = 0.15 km<sup>-1</sup>  
 Layer Height max = 5.187 km  
 Layer Height min = 0.038 km  
 Height of Extinc.koef.max = 4.768 km  
 Effective Height of Layer = 2.790 km

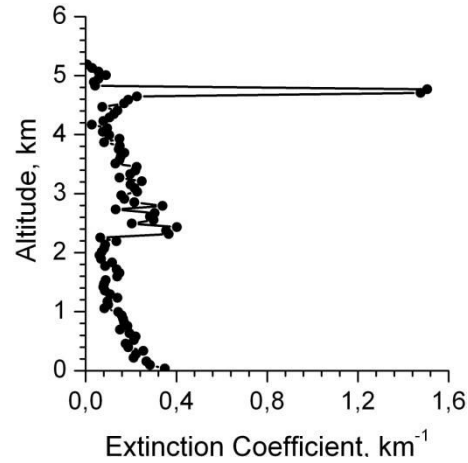**Figure S52.**

Date: August 11, 2010  
 Time(GMT) = 11h 12m 5.0s  
 Latitude, deg = 47.8663  
 Longitude, deg = 29.1510  
 AOD 532 = 0.93  
 Extinc.koef.max = 0.78 km<sup>-1</sup>  
 Extinc.koef.average = 0.21 km<sup>-1</sup>  
 Extinc.koef.median = 0.18 km<sup>-1</sup>  
 Layer Height max = 4.648 km  
 Layer Height min = 0.277 km  
 Height of Extinc.koef.max = 0.337 km  
 Effective Height of Layer = 1.573 km

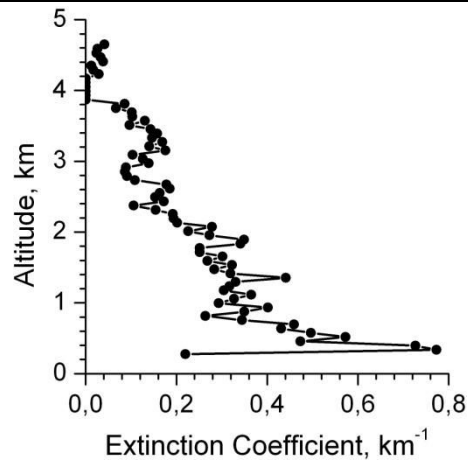



**Figure S53.**

Date: August 11, 2010  
 Time(GMT) = 11h 12m 8.6s  
 Latitude, deg = 48.0868  
 Longitude, deg = 29.0639  
 AOD 532 = 0.96  
 Extinc.koef.max = 0.77 km<sup>-1</sup>  
 Extinc.koef.average = 0.22 km<sup>-1</sup>  
 Extinc.koef.median = 0.18 km<sup>-1</sup>  
 Layer Height max = 4.648 km  
 Layer Height min = 0.277 km  
 Height of Extinc.koef.max = 0.337 km  
 Effective Height of Layer = 1.666 km

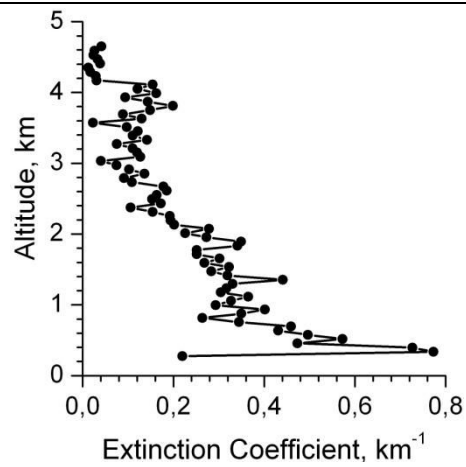**Figure S54.**

Date: August 11, 2010  
 Time(GMT) = 11h 12m 12.6s  
 Latitude, deg = 48.3082  
 Longitude, deg = 28.9766  
 AOD 532 = 0.93  
 Extinc.koef.max = 0.77 km<sup>-1</sup>  
 Extinc.koef.average = 0.21 km<sup>-1</sup>  
 Extinc.koef.median = 0.17 km<sup>-1</sup>  
 Layer Height max = 4.648 km  
 Layer Height min = 0.277 km  
 Height of Extinc.koef.max = 0.337 km  
 Effective Height of Layer = 1.591 km

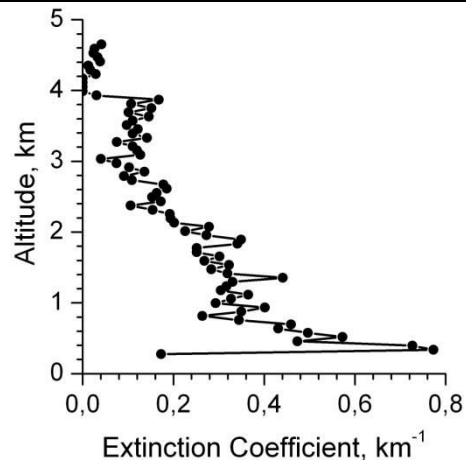**Figure S55.**

Date: August 11, 2010  
 Time(GMT) = 11h 12m 25.9s  
 Latitude, deg = 49.1026  
 Longitude, deg = 28.6557  
 AOD 532 = 0.50  
 Extinc.koef.max = 0.65 km<sup>-1</sup>  
 Extinc.koef.average = 0.15 km<sup>-1</sup>  
 Extinc.koef.median = 0.12 km<sup>-1</sup>  
 Layer Height max = 3.810 km  
 Layer Height min = 0.397 km  
 Height of Extinc.koef.max = 0.397 km  
 Effective Height of Layer = 1.536 km

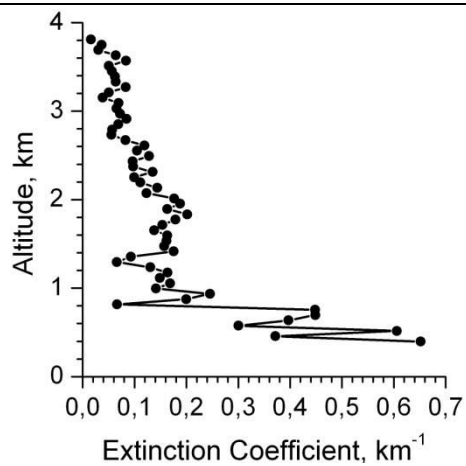

**Figure S56.**

Date: August 12, 2010  
Time(GMT) = 0h 44m 50.9s  
Latitude, deg = 51.9065  
Longitude, deg = 25.5926  
AOD 532 = 0.51  
Extinc.koef.max = 0.96 km<sup>-1</sup>  
Extinc.koef.average = 0.13 km<sup>-1</sup>  
Extinc.koef.median = 0.06 km<sup>-1</sup>  
Layer Height max = 4.22913 km  
Layer Height min = 0.277296 km  
Height of Extinc.koef.max = 2.133 km  
Effective Height of Layer = 2.273 km

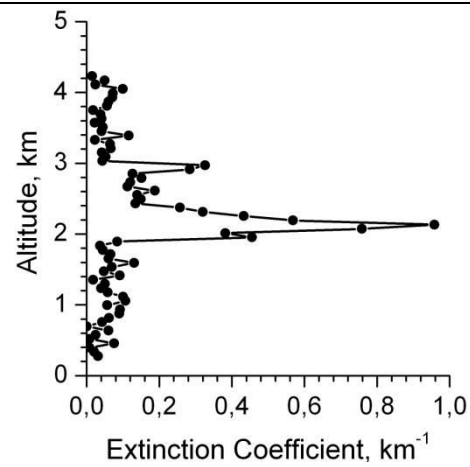

**Figure S57.**

Date: August 12, 2010  
Time(GMT) = 0h 45m 13.9s  
Latitude, deg = 50.5437  
Longitude, deg = 24.9904  
AOD 532 = 0.68  
Extinc.koef.max = 0.96 km<sup>-1</sup>  
Extinc.koef.average = 0.20 km<sup>-1</sup>  
Extinc.koef.median = 0.13 km<sup>-1</sup>  
Layer Height max = 3.810 km  
Layer Height min = 0.337 km  
Height of Extinc.koef.max = 3.271 km  
Effective Height of Layer = 2.182 km

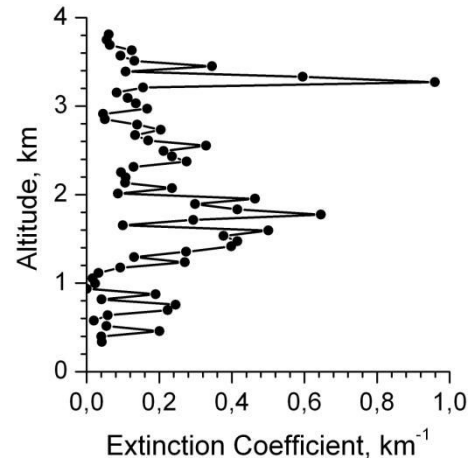

**Figure S58.**

Date: August 12, 2010  
Time(GMT) = 0h 45m 42.2s  
Latitude, deg = 48.8696  
Longitude, deg = 24.2911  
AOD 532 = 0.65  
Extinc.koef.max = 0.53 km<sup>-1</sup>  
Extinc.koef.average = 0.23 km<sup>-1</sup>  
Extinc.koef.median = 0.21 km<sup>-1</sup>  
Layer Height max = 3.511 km  
Layer Height min = 0.637 km  
Height of Extinc.koef.max = 0.936 km  
Effective Height of Layer = 2.211 km

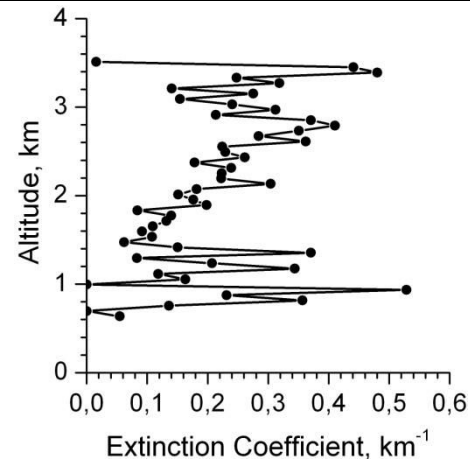

**Figure S59.**

Date: August 12, 2010  
 Time(GMT) = 0h 46m 3.8s  
 Latitude, deg = 47.5893  
 Longitude, deg = 23.7827  
 AOD 532 = 1.65  
 Extinc.koef.max = 7.01 km<sup>-1</sup>  
 Extinc.koef.average = 0.61 km<sup>-1</sup>  
 Extinc.koef.median = 0.24 km<sup>-1</sup>  
 Layer Height max = 3.271 km  
 Layer Height min = 0.577 km  
 Height of Extinc.koef.max = 1.475 km  
 Effective Height of Layer = 1.342 km

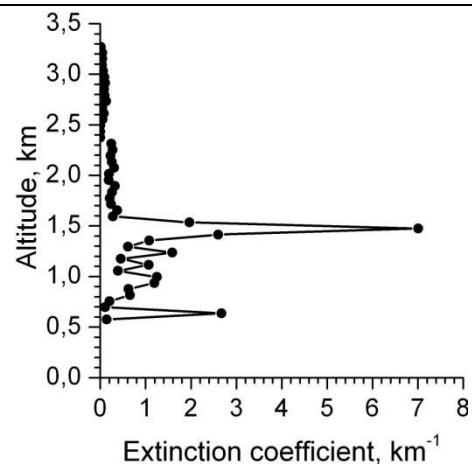**Figure S60.**

Date: August 12, 2010  
 Time(GMT) = 0h 46m 53.6s  
 Latitude, deg = 44.6243  
 Longitude, deg = 22.6808  
 AOD 532 = 0.83  
 Extinc.koef.max = 1.12 km<sup>-1</sup>  
 Extinc.koef.average = 0.22 km<sup>-1</sup>  
 Extinc.koef.median = 0.10 km<sup>-1</sup>  
 Layer Height max = 3.930 km  
 Layer Height min = 0.098 km  
 Height of Extinc.koef.max = 0.158 km  
 Effective Height of Layer = 1.000 km

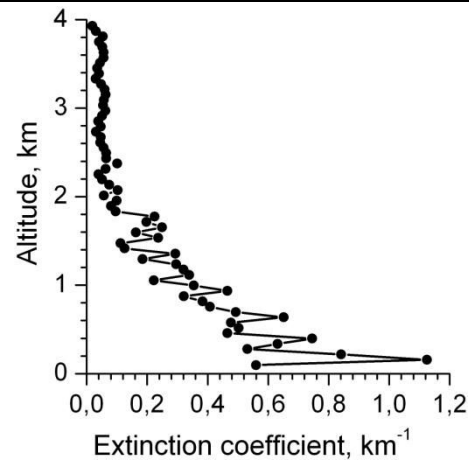**Figure S61.**

Date: August 12, 2010  
 Time(GMT) = 23h 49m 11.3s  
 Latitude, deg = 52.0120  
 Longitude, deg = 39.5455  
 AOD 532 = 0.65  
 Extinc.koef.max = 0.47 km<sup>-1</sup>  
 Extinc.koef.average = 0.12 km<sup>-1</sup>  
 Extinc.koef.median = 0.05 km<sup>-1</sup>  
 Layer Height max = 5.487 km  
 Layer Height min = 0.217 km  
 Height of Extinc.koef.max = 0.876 km  
 Effective Height of Layer = 1.477 km

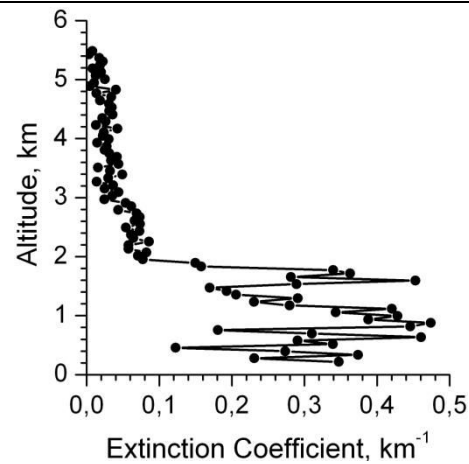

**Figure S62.**

Date: August 12, 2010  
Time(GMT) = 23h 49m 44.8s  
Latitude, deg = 50.0322  
Longitude, deg = 38.6777  
AOD 532 = 0.98  
Extinc.koef.max = 1.42 km<sup>-1</sup>  
Extinc.koef.average = 0.23 km<sup>-1</sup>  
Extinc.koef.median = 0.11 km<sup>-1</sup>  
Layer Height max = 4.409 km  
Layer Height min = 0.217 km  
Height of Extinc.koef.max = 0.277 km  
Effective Height of Layer = 1.256 km

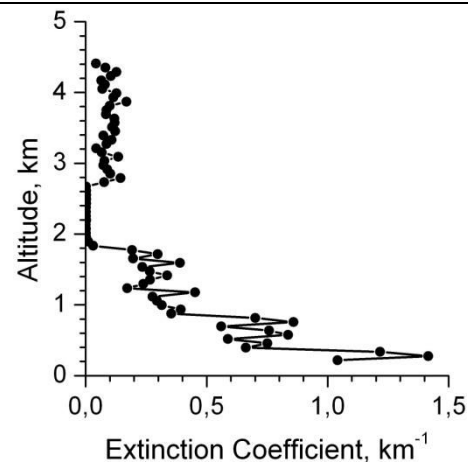**Figure S63.**

Date: August 12, 2010  
Time(GMT) = 23h 49m 55.9s  
Latitude, deg = 49.3706  
Longitude, deg = 38.4015  
AOD 532 = 1.0  
Extinc.koef.max = 1.42 km<sup>-1</sup>  
Extinc.koef.average = 0.25 km<sup>-1</sup>  
Extinc.koef.median = 0.20 km<sup>-1</sup>  
Layer Height max = 4.229 km  
Layer Height min = 0.217 km  
Height of Extinc.koef.max = 0.277 km  
Effective Height of Layer = 1.380 km

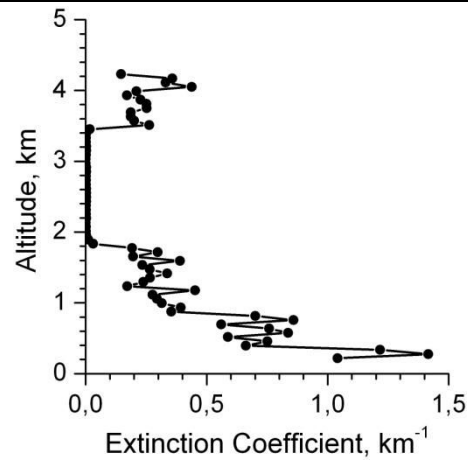**Figure S64.**

Date: August 13, 2010  
Time(GMT) = 10h 59m 17.9s  
Latitude, deg = 46.4181  
Longitude, deg = 32.7968  
AOD 532 = 0.67  
Extinc.koef.max = 0.73 km<sup>-1</sup>  
Extinc.koef.average = 0.13 km<sup>-1</sup>  
Extinc.koef.median = 0.08 km<sup>-1</sup>  
Layer Height max = 5.127 km  
Layer Height min = 0.098 km  
Height of Extinc.koef.max = 1.834 km  
Effective Height of Layer = 1.862 km

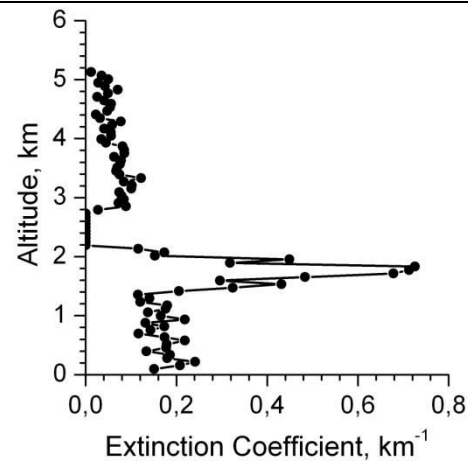

**Figure S65.**

Date: August 13, 2010  
 Time(GMT) = 11h 0m 5.8s  
 Latitude, deg = 49.2469  
 Longitude, deg = 31.6873  
 AOD 532 = 0.44  
 Extinc.koef.max = 0.23 km<sup>-1</sup>  
 Extinc.koef.average = 0.09 km<sup>-1</sup>  
 Extinc.koef.median = 0.08 km<sup>-1</sup>  
 Layer Height max = 5.427 km  
 Layer Height min = 0.277 km  
 Height of Extinc.koef.max = 0.337 km  
 Effective Height of Layer = 2.205 km

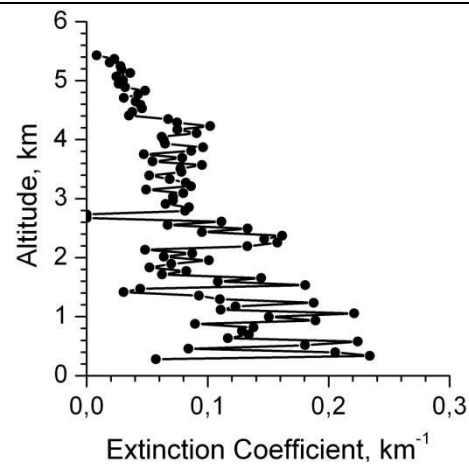**Figure S66.**

Date: August 14, 2010  
 Time(GMT) = 0h 32m 24.0s  
 Latitude, deg = 52.1579  
 Longitude, deg = 28.7969  
 AOD 532 = 0.64  
 Extinc.koef.max = 0.63 km<sup>-1</sup>  
 Extinc.koef.average = 0.16 km<sup>-1</sup>  
 Extinc.koef.median = 0.15 km<sup>-1</sup>  
 Layer Height max = 4.109 km  
 Layer Height min = 0.158 km  
 Height of Extinc.koef.max = 0.337 km  
 Effective Height of Layer = 1.568 km

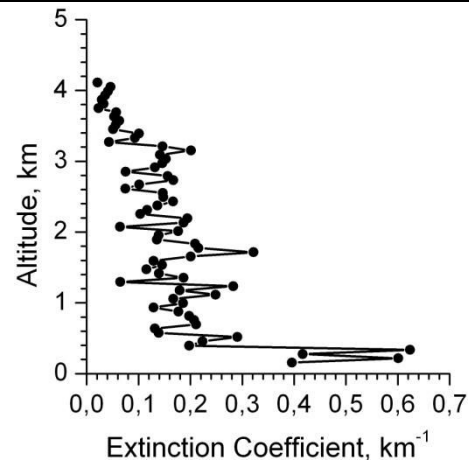**Figure S67.**

Date: August 14, 2010  
 Time(GMT) = 0h 32m 48.5s  
 Latitude, deg = 50.7072  
 Longitude, deg = 28.1514  
 AOD 532 = 0.73  
 Extinc.koef.max = 0.56 km<sup>-1</sup>  
 Extinc.koef.average = 0.16 km<sup>-1</sup>  
 Extinc.koef.median = 0.14 km<sup>-1</sup>  
 Layer Height max = 4.948 km  
 Layer Height min = 0.277 km  
 Height of Extinc.koef.max = 1.415 km  
 Effective Height of Layer = 2.229 km

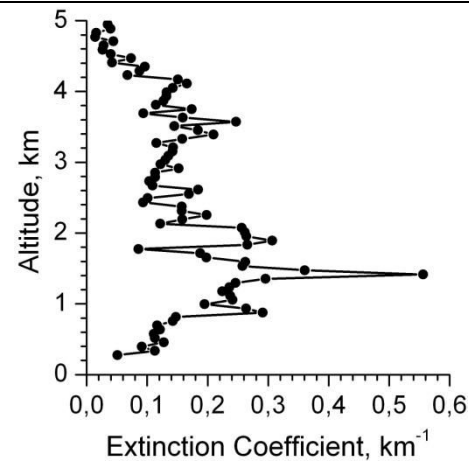

**Figure S68.**

Date: August 14, 2010  
Time(GMT) = 0h 32m 55.2s  
Latitude, deg = 50.3112  
Longitude, deg = 27.9810  
AOD 532 = 0.59  
Extinc.koef.max = 0.44 km<sup>-1</sup>  
Extinc.koef.average = 0.14 km<sup>-1</sup>  
Extinc.koef.median = 0.12 km<sup>-1</sup>  
Layer Height max = 5.247 km  
Layer Height min = 0.936 km  
Height of Extinc.koef.max = 1.714 km  
Effective Height of Layer = 2.308 km

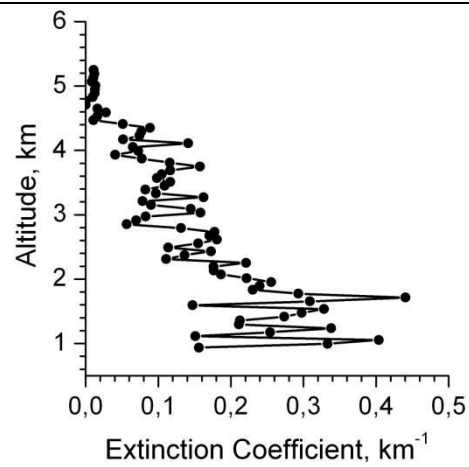**Figure S69.**

Date: August 17, 2010  
Time(GMT) = 10h 34m 34.7s  
Latitude, deg = 46.5620  
Longitude, deg = 38.9265  
AOD 532 = 0.54  
Extinc.koef.max = 0.47 km<sup>-1</sup>  
Extinc.koef.average = 0.209 km<sup>-1</sup>  
Extinc.koef.median = 0.16 km<sup>-1</sup>  
Layer Height max = 2.672 km  
Layer Height min = 0.098 km  
Height of Extinc.koef.max = 0.158 km  
Effective Height of Layer = 0.987 km

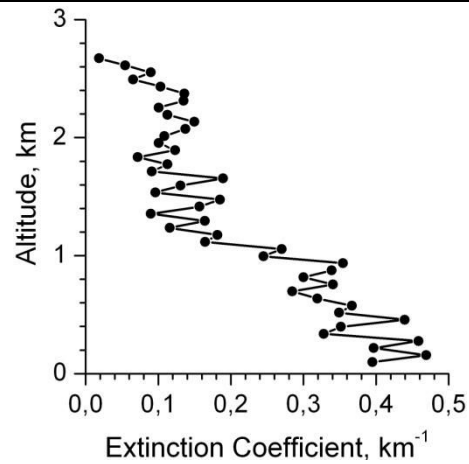**Figure S70.**

Date: August 17, 2010  
Time(GMT) = 10h 34m 37.6s  
Latitude, deg = 46.7382  
Longitude, deg = 38.8598  
AOD 532 = 0.60  
Extinc.koef.max = 0.47 km<sup>-1</sup>  
Extinc.koef.average = 0.23 km<sup>-1</sup>  
Extinc.koef.median = 0.19 km<sup>-1</sup>  
Layer Height max = 2.672 km  
Layer Height min = 0.038 km  
Height of Extinc.koef.max = 0.158 km  
Effective Height of Layer = 1.044 km

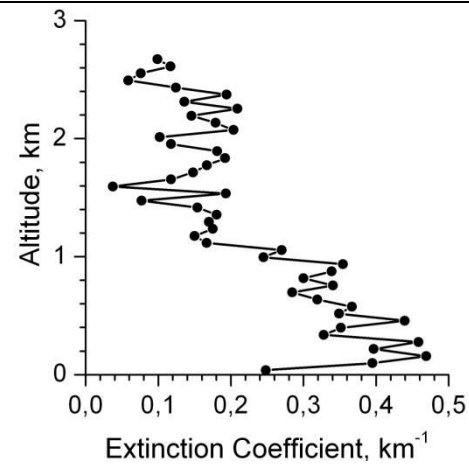

**Figure S71.**

Date: August 17, 2010  
 Time(GMT) = 10h 34m 55.6s  
 Latitude, deg = 47.7997  
 Longitude, deg = 38.4518  
 AOD 532 = 0.70  
 Extinc.koef.max = 0.53 km<sup>-1</sup>  
 Extinc.koef.average = 0.31 km<sup>-1</sup>  
 Extinc.koef.median = 0.29 km<sup>-1</sup>  
 Layer Height max = 2.433 km  
 Layer Height min = 0.157 km  
 Height of Extinc.koef.max = 1.175 km  
 Effective Height of Layer = 1.154 km

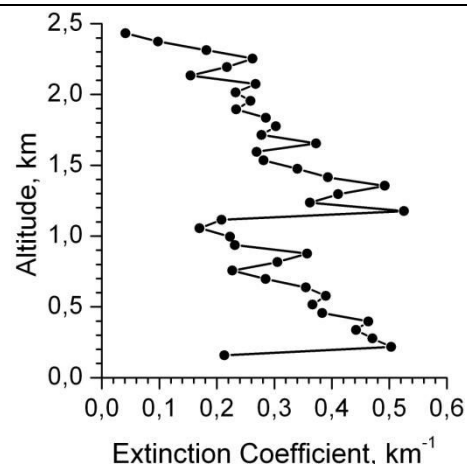**Figure S72.**

Date: August 17, 2010  
 Time(GMT) = 10h 34m 59.9s  
 Latitude, deg = 48.0657  
 Longitude, deg = 38.3472  
 AOD 532 = 1.29  
 Extinc.koef.max = 1.298 km<sup>-1</sup>  
 Extinc.koef.average = 0.62 km<sup>-1</sup>  
 Extinc.koef.median = 0.64 km<sup>-1</sup>  
 Layer Height max = 2.373 km  
 Layer Height min = 0.277 km  
 Height of Extinc.koef.max = 0.278 km  
 Effective Height of Layer = 1.106 km

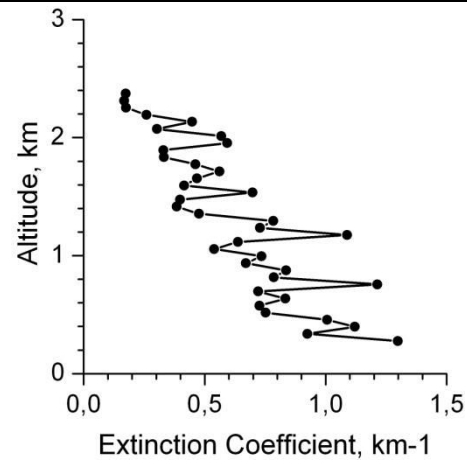**Figure S73.**

Date: August 17, 2010  
 Time(GMT) = 10h 35m 7.4s  
 Latitude, deg = 48.5061  
 Longitude, deg = 38.1715  
 AOD 532 = 1.13  
 Extinc.koef.max = 1.30 km<sup>-1</sup>  
 Extinc.koef.average = 0.53 km<sup>-1</sup>  
 Extinc.koef.median = 0.44 km<sup>-1</sup>  
 Layer Height max = 2.373 km  
 Layer Height min = 0.217 km  
 Height of Extinc.koef.max = 0.277 km  
 Effective Height of Layer = 1.006 km

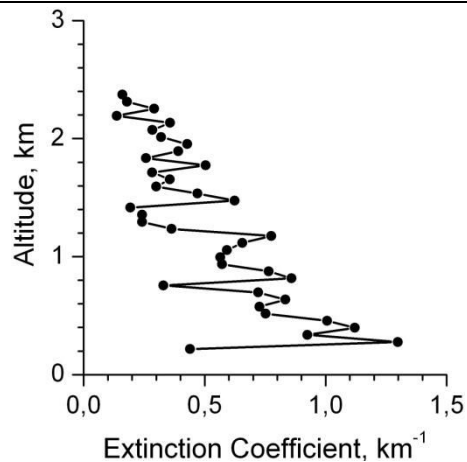

**Figure S74.**

Date: August 17, 2010  
 Time(GMT) = 10h 35m 31.2s  
 Latitude, deg = 49.9175  
 Longitude, deg = 37.5923  
 AOD 532 = 0.92  
 Extinc.koef.max = 0.90 km<sup>-1</sup>  
 Extinc.koef.average = 0.35 km<sup>-1</sup>  
 Extinc.koef.median = 0.34 km<sup>-1</sup>  
 Layer Height max = 2.852 km  
 Layer Height min = 0.217 km  
 Height of Extinc.koef.max = 0.217 km  
 Effective Height of Layer = 1.239 km

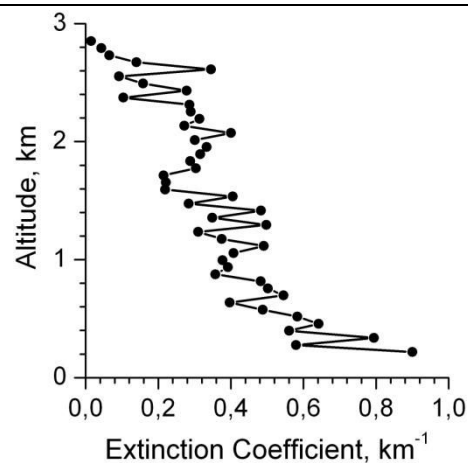**Figure S75.**

Date: August 17, 2010  
 Time(GMT) = 10h 35m 46.3s  
 Latitude, deg = 50.7986  
 Longitude, deg = 37.2157  
 AOD 532 = 1.00  
 Extinc.koef.max = 1.12 km<sup>-1</sup>  
 Extinc.koef.average = 0.41 km<sup>-1</sup>  
 Extinc.koef.median = 0.35 km<sup>-1</sup>  
 Layer Height max = 2.732 km  
 Layer Height min = 0.277 km  
 Height of Extinc.koef.max = 0.936 km  
 Effective Height of Layer = 1.480 km

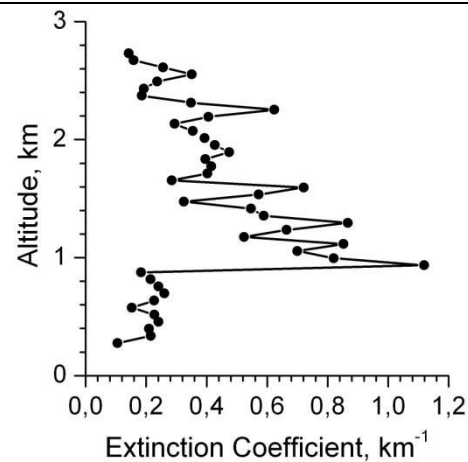**Figure S76.**

Date: August 17, 2010  
 Time(GMT) = 10h 35m 53.5s  
 Latitude, deg = 51.2378  
 Longitude, deg = 37.0233  
 AOD 532 = 0.75  
 Extinc.koef.max = 0.71 km<sup>-1</sup>  
 Extinc.koef.average = 0.24 km<sup>-1</sup>  
 Extinc.koef.median = 0.23 km<sup>-1</sup>  
 Layer Height max = 3.331 km  
 Layer Height min = 0.277 km  
 Height of Extinc.koef.max = 2.193 km  
 Effective Height of Layer = 1.900 km

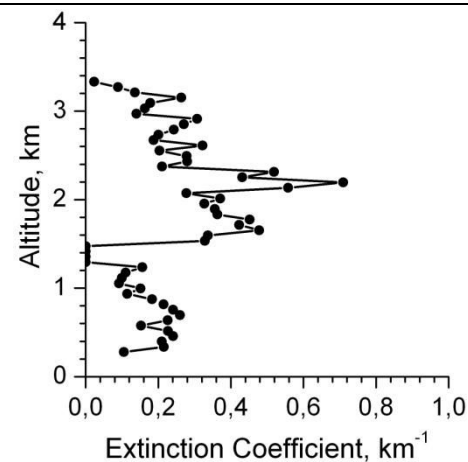



**Figure S77.**

Date: August 17, 2010  
 Time(GMT) = 10h 35m 58.2s  
 Latitude, deg = 51.5019  
 Longitude, deg = 36.9061  
 AOD 532 = 1.21  
 Extinc.koef.max = 1.95 km<sup>-1</sup>  
 Extinc.koef.average = 0.41 km<sup>-1</sup>  
 Extinc.koef.median = 0.28 km<sup>-1</sup>  
 Layer Height max = 3.271 km  
 Layer Height min = 0.277 km  
 Height of Extinc.koef.max = 0.277 km  
 Effective Height of Layer = 1.170 km

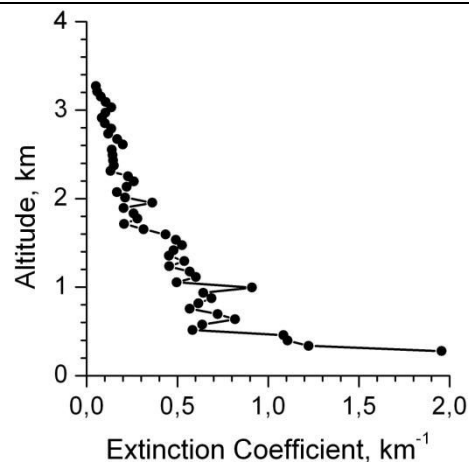**Figure S78.**

Date: August 17, 2010  
 Time(GMT) = 10h 36m 11.5s  
 Latitude, deg = 52.2944  
 Longitude, deg = 36.5470  
 AOD 532 = 1.6  
 Extinc.koef.max = 1.86 km<sup>-1</sup>  
 Extinc.koef.average = 0.52 km<sup>-1</sup>  
 Extinc.koef.median = 0.46 km<sup>-1</sup>  
 Layer Height max = 3.271 km  
 Layer Height min = 0.277 km  
 Height of Extinc.koef.max = 0.397 km  
 Effective Height of Layer = 1.280 km

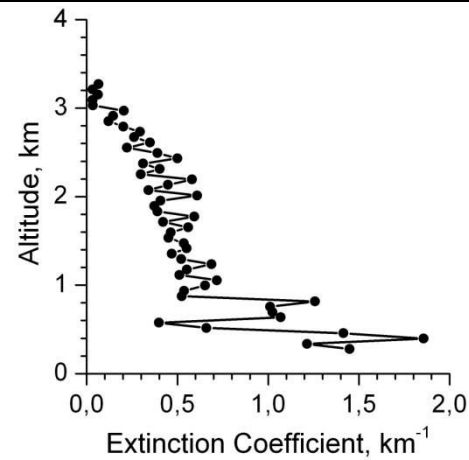**Figure S79.**

Date: August 18, 2010  
 Time(GMT) = 0h 7m 36.2s  
 Latitude, deg = 52.2810  
 Longitude, deg = 35.0353  
 AOD 532 = 1.22  
 Extinc.koef.max = 2.18 km<sup>-1</sup>  
 Extinc.koef.average = 0.42 km<sup>-1</sup>  
 Extinc.koef.median = 0.35 km<sup>-1</sup>  
 Layer Height max = 3.271 km  
 Layer Height min = 0.337 km  
 Height of Extinc.koef.max = 0.337 km  
 Effective Height of Layer = 1.355 km

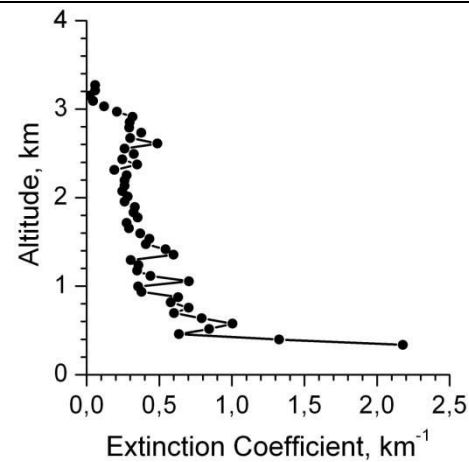

**Figure S80.**

Date: August 18, 2010  
 Time(GMT) = 0h 7m 40.7s  
 Latitude, deg = 52.0174  
 Longitude, deg = 34.9148  
 AOD 532 = 2.47  
 Extinc.koef.max = 8.94 km<sup>-1</sup>  
 Extinc.koef.average = 0.88 km<sup>-1</sup>  
 Extinc.koef.median = 0.47 km<sup>-1</sup>  
 Layer Height max = 3.091 km  
 Layer Height min = 0.277 km  
 Height of Extinc.koef.max = 0.277 km  
 Effective Height of Layer = 0.986 km

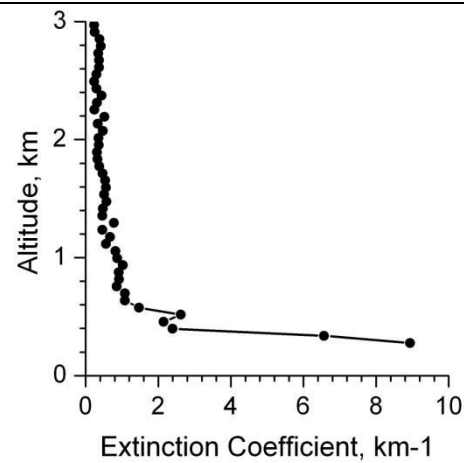**Figure S81.**

Date: August 18, 2010  
 Time(GMT) = 0h 7m 44.4s  
 Latitude, deg = 51.7977  
 Longitude, deg = 34.8150  
 AOD 532 = 1.34  
 Extinc.koef.max = 2.53 km<sup>-1</sup>  
 Extinc.koef.average = 0.47 km<sup>-1</sup>  
 Extinc.koef.median = 0.37 km<sup>-1</sup>  
 Layer Height max = 3.15 km<sup>-1</sup>  
 Layer Height min = 0.277 km  
 Height of Extinc.koef.max = 0.277 km  
 Effective Height of Layer = 1.374 km

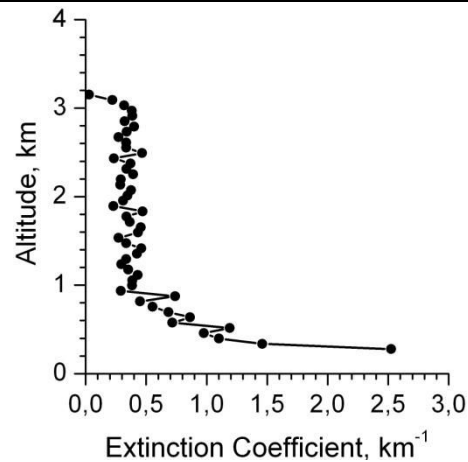**Figure S82.**

Date: August 18, 2010  
 Time(GMT) = 0h 8m 3.0s  
 Latitude, deg = 50.6980  
 Longitude, deg = 34.3292  
 AOD 532 = 2.22  
 Extinc.koef.max = 6.59 km<sup>-1</sup>  
 Extinc.koef.average = 0.70 km<sup>-1</sup>  
 Extinc.koef.median = 0.52 km<sup>-1</sup>  
 Layer Height max = 3.451 km  
 Layer Height min = 0.277 km  
 Height of Extinc.koef.max = 0.277 km  
 Effective Height of Layer = 1.432 km

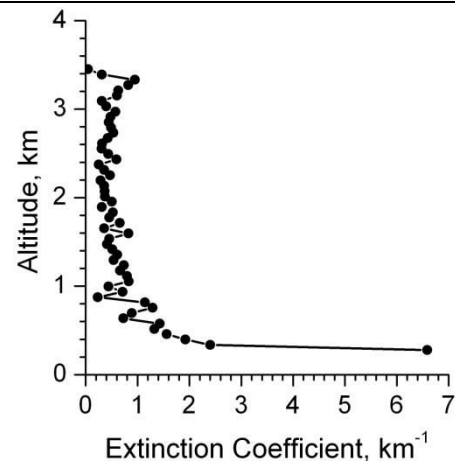

**Figure S83.**

Date: August 18, 2010  
 Time(GMT) = 0h 8m 13.4s  
 Latitude, deg = 50.0819  
 Longitude, deg = 34.0654  
 AOD 532 = 2.28  
 Extinc.koef.max = 2.96 km<sup>-1</sup>  
 Extinc.koef.average = 0.67 km<sup>-1</sup>  
 Extinc.koef.median = 0.49 km<sup>-1</sup>  
 Layer Height max = 3.630 km  
 Layer Height min = 0.217 km  
 Height of Extinc.koef.max = 0.277 km  
 Effective Height of Layer = 1.432 km

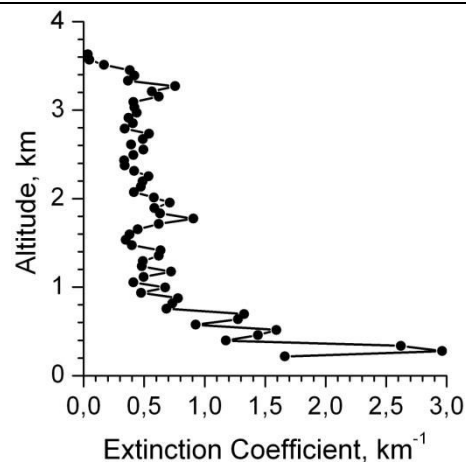**Figure S84.**

Date: August 18, 2010  
 Time(GMT) = 0h 8m 26.1s  
 Latitude, deg = 49.3315  
 Longitude, deg = 33.7523  
 AOD 532 = 2.93  
 Extinc.koef.max = 6.75 km<sup>-1</sup>  
 Extinc.koef.average = 0.73 km<sup>-1</sup>  
 Extinc.koef.median = 0.55 km<sup>-1</sup>  
 Layer Height max = 4.169 km  
 Layer Height min = 0.158 km  
 Height of Extinc.koef.max = 0.158 km  
 Effective Height of Layer = 1.439 km

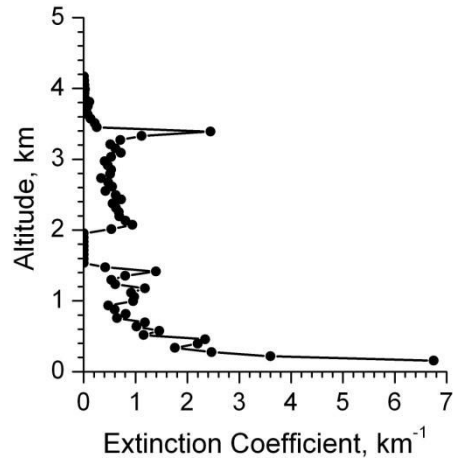**Figure S85.**

Date: August 18, 2010  
 Time(GMT) = 0h 8m 47.6s  
 Latitude, deg = 48.0531  
 Longitude, deg = 33.2365  
 AOD 532 = 1.01  
 Extinc.koef.max = 1.77 km<sup>-1</sup>  
 Extinc.koef.average = 0.32 km<sup>-1</sup>  
 Extinc.koef.median = 0.25 km<sup>-1</sup>  
 Layer Height max = 4.469 km  
 Layer Height min = 1.295 km  
 Height of Extinc.koef.max = 1.834 km  
 Effective Height of Layer = 2.369 km

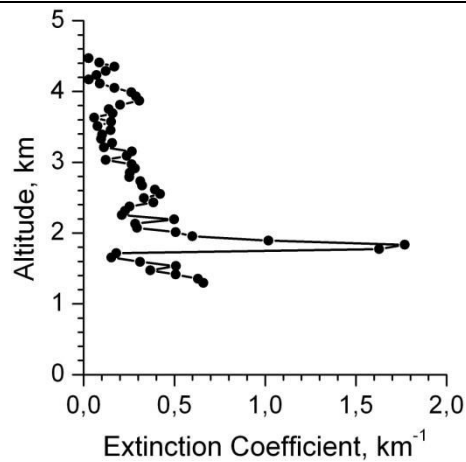

**Figure S86.**

Date: August 18, 2010  
Time(GMT) = 0h 8m 55.1s  
Latitude, deg = 47.6110  
Longitude, deg = 33.0633  
AOD 532 = 1.46  
Extinc.koef.max = 0.77 km<sup>-1</sup>  
Extinc.koef.average = 0.33 km<sup>-1</sup>  
Extinc.koef.median = 0.32 km<sup>-1</sup>  
Layer Height max = 4.588 km  
Layer Height min = 0.158 km  
Height of Extinc.koef.max = 1.714 km  
Effective Height of Layer = 1.918 km

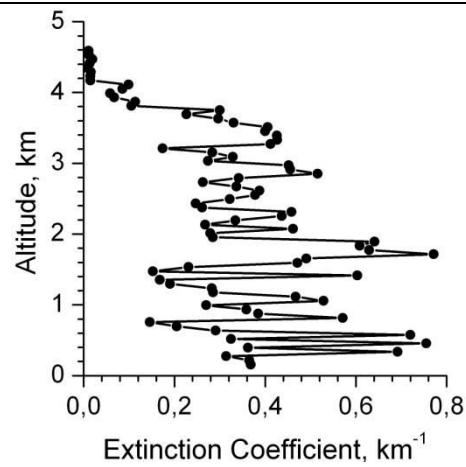

**Figure S87.**

Date: August 18, 2010  
Time(GMT) = 0h 9m 9.9s  
Latitude, deg = 46.7278  
Longitude, deg = 32.7242  
AOD 532 = 2.24  
Extinc.koef.max = 4.27 km<sup>-1</sup>  
Extinc.koef.average = 0.56 km<sup>-1</sup>  
Extinc.koef.median = 0.41 km<sup>-1</sup>  
Layer Height max = 4.109 km  
Layer Height min = 0.098 km  
Height of Extinc.koef.max = 1.235 km  
Effective Height of Layer = 1.635 km

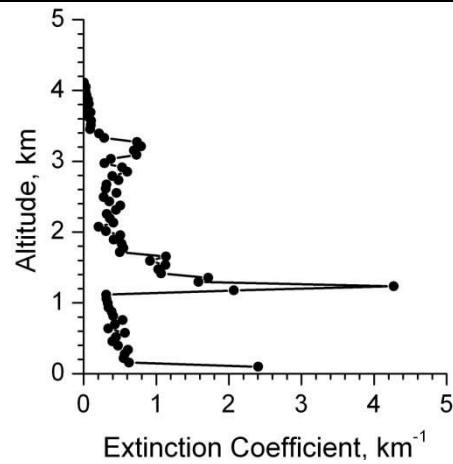

**Figure S88.**

Date: August 18, 2010  
Time(GMT) = 0h 9m 15.9s  
Latitude, deg = 46.3741  
Longitude, deg = 32.5909  
AOD 532 = 1.17  
Extinc.koef.max = 1.14 km<sup>-1</sup>  
Extinc.koef.average = 0.53 km<sup>-1</sup>  
Extinc.koef.median = 0.52 km<sup>-1</sup>  
Layer Height max = 3.630 km  
Layer Height min = 1.415 km  
Height of Extinc.koef.max = 1.654 km  
Effective Height of Layer = 2.305 km

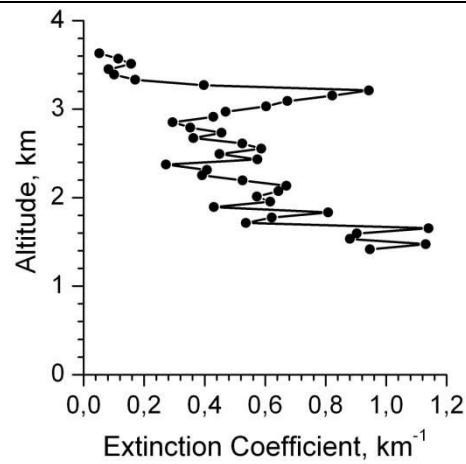

Supplement: Supplementary file 1 [file amt-2017-336-supplement.pdf]
